# Supplementary material
Source: Springer Nature journal article supplement (https://www.springermedizin.de/resource/supplementary/12948_2010_81_MOESM3_ESM.pdf/9557154)

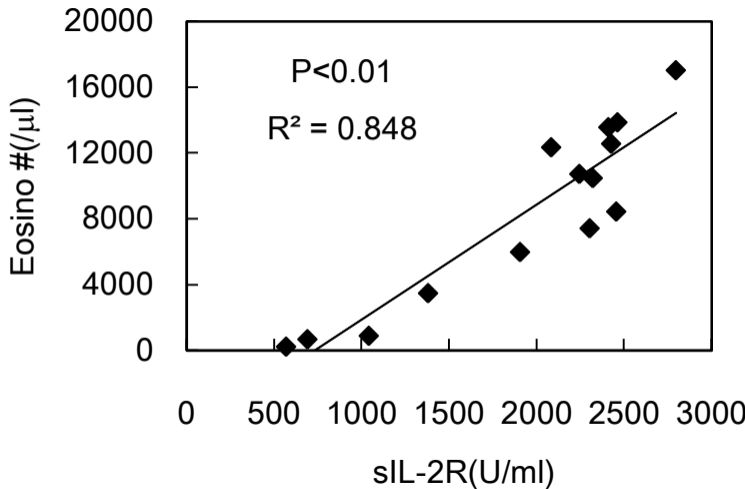

Supplement: MOESM3 [file 9557154]
